# Supplementary material
Source: publisher figshare collection journal article supplement (https://acs.figshare.com/ndownloader/files/9128941)
Supplement: Supplementary file 1 [file 9128941]

## **Supporting Information**

### **Fabrication of Mesoporous Polystyrene Films with Controlled Porosity and Pore Size by Solvent Annealing for Templated Syntheses**

Mohan Raj Krishnan, Yu-Cheng Chien, Chung-Fu Cheng, and Rong-Ming Ho\*

Department of Chemical Engineering, National Tsing Hua University, Hsinchu 30013,  
Taiwan, R.O.C.

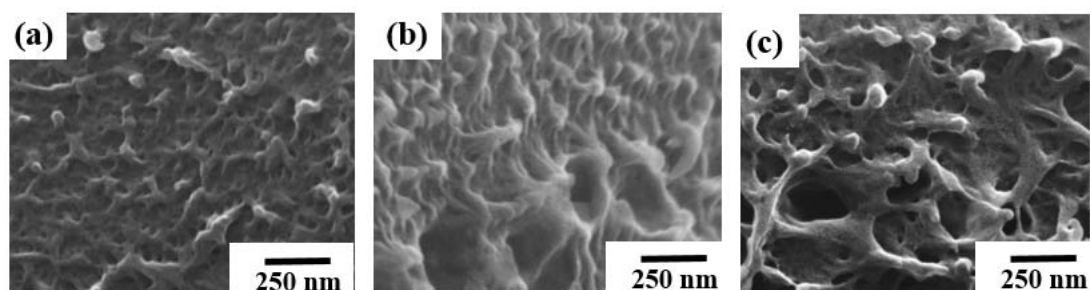

**Figure S1.** Morphological evolution of PS films during DMF vapor annealing process at saturation vapor pressure. The SEM images of PS films quenched at different stages of solvent vapor annealing for (a) 5 min, (b) 30 min and (c) 60 min, respectively.

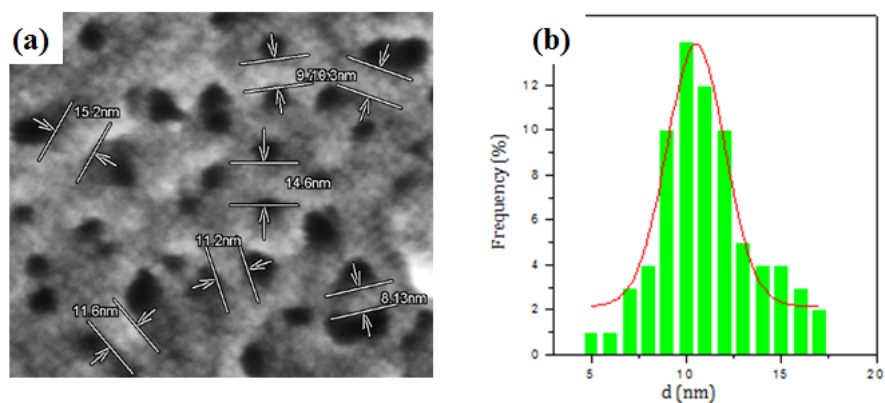

**Figure S2.** Framework size determination of mesoporous PS film. (a) SEM image of mesoporous PS film prepared under solvent uptake of 24% and annealing for 5 min. (b) the corresponding framework size histogram. A similar approach has been used to evaluate the framework sizes of the mesoporous PS films prepared under other experimental conditions.

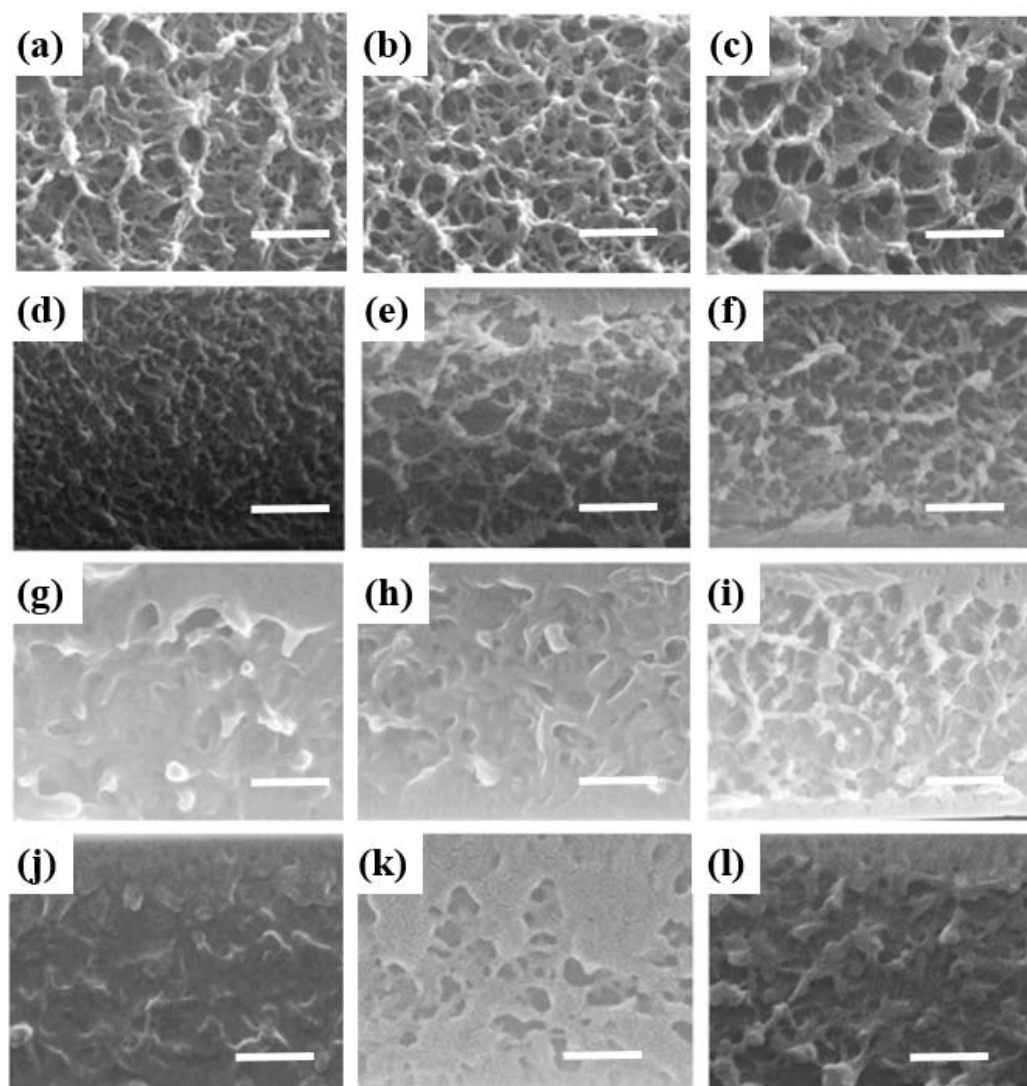

**Figure S3.** SEM images of the mesoporous PS film prepared with various solvent uptake and different annealing time. (a) solvent uptake of 38% and annealing for 5 min; (b) 38%, 30 min; (c) 38%, 60 min. (d) 24%, 5 min; (e) 24%, 30 min; (f) 24%, 60 min; (g) 12%, 5 min; (h) 12%, 30 min; (i) 12%, 60 min; (j) 6%, 5 min; (k) 6%, 30 min; (l) 6%, 60 min. Scale bar: 200 nm.

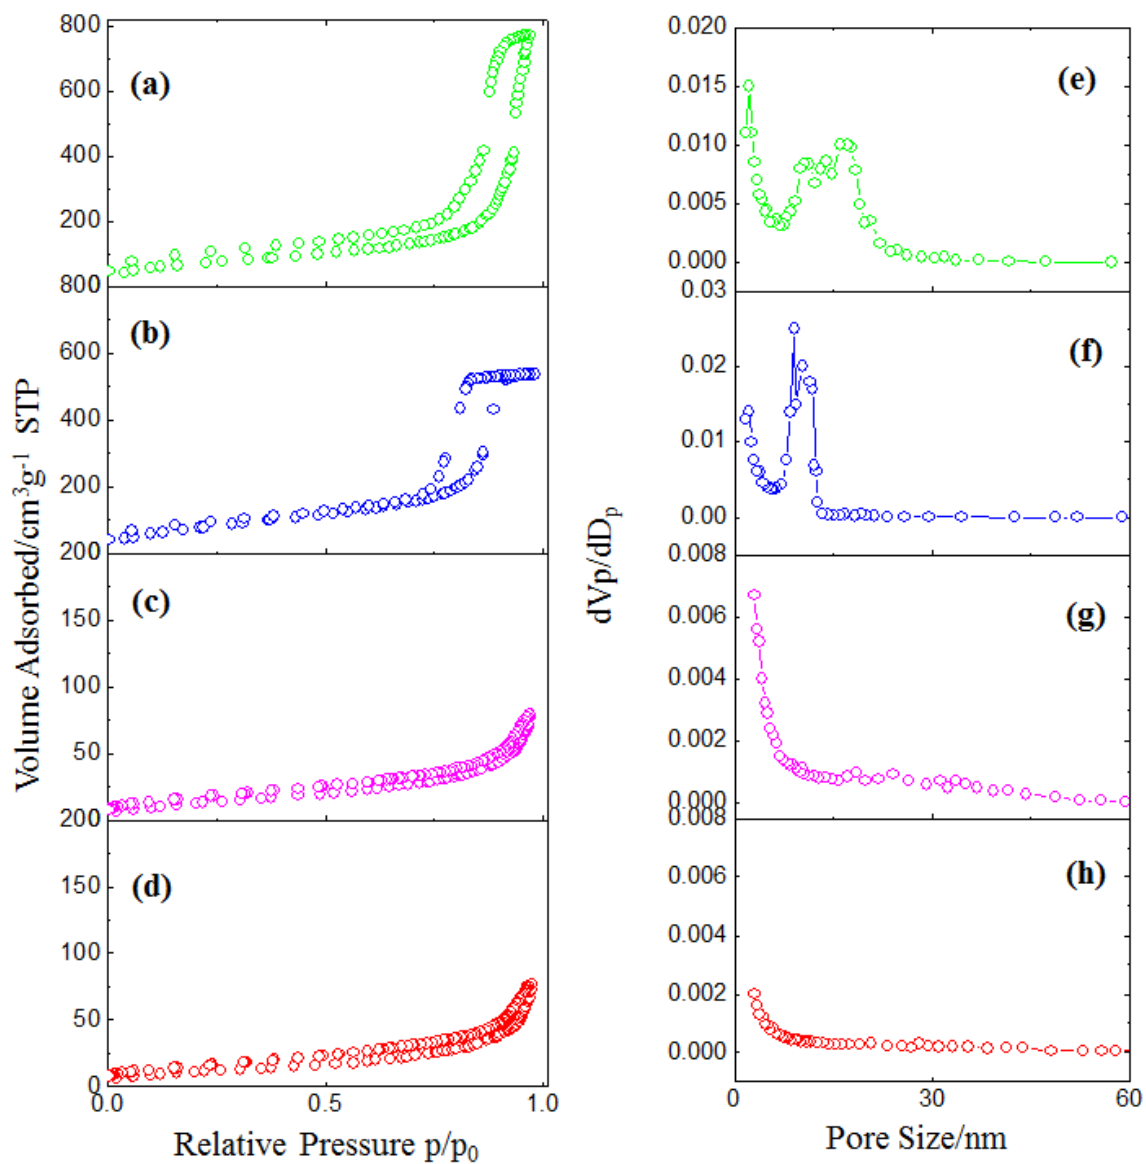

**Figure S4.** N<sub>2</sub> sorption isotherms (a-d) and BJH analyses (e-h) of mesoporous PS films prepared under different solvent uptake conditions of 38% (a and e); 24% (b and f); 12% (c and g) and 6% (d and h).

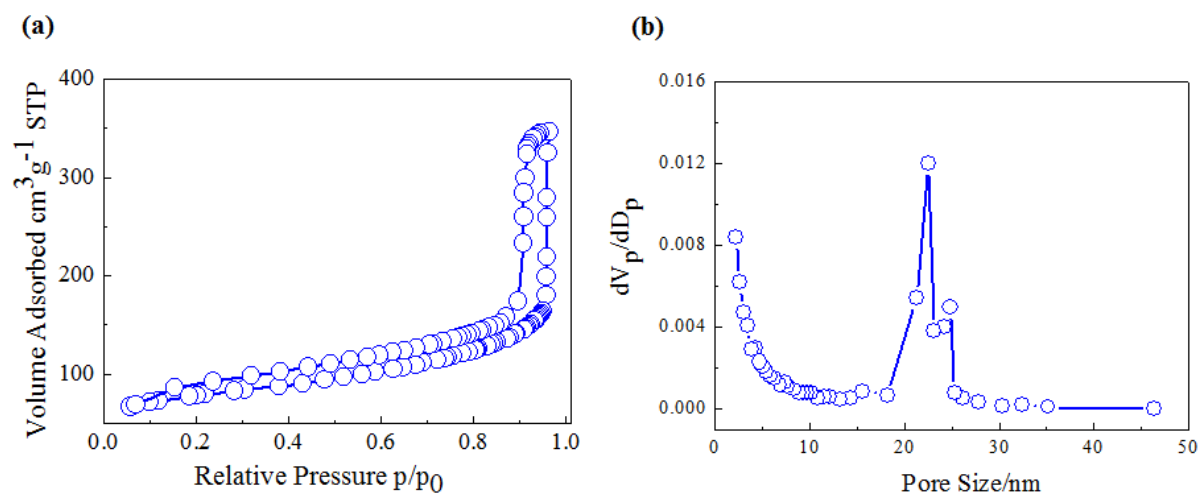

**Figure S5.** N<sub>2</sub> sorption isotherms (a) and BJH analyses (b) of mesoporous SiO<sub>2</sub> prepared by templated synthesis using sol-gel technique with fabricated mesoporous PS as a template material.
